# Supplementary material
Source: ML conference proceedings conference paper supplement (https://proceedings.neurips.cc/paper_files/paper/2018/hash/d2ed45a52bc0edfa11c2064e9edee8bf-Abstract.html)
Supplement: Supplementary file [file d2ed45a52bc0edfa11c2064e9edee8bf-Supplemental.zip]

---

# Supplementary Material for Partially-Supervised Image Captioning

---

**Peter Anderson**  
Macquarie University\*  
Sydney, Australia  
p.anderson@mq.edu.au

**Stephen Gould**  
Australian National University  
Canberra, Australia  
stephen.gould@anu.edu.au

**Mark Johnson**  
Macquarie University  
Sydney, Australia  
mark.johnson@mq.edu.au

As supplementary material we provide additional caption examples for COCO novel object captioning in Figure 1, and for captions trained with Open Images in Figure 2. Further analysis of the impact of adding pre-trained word embeddings to the base model is included in Table 1.

Table 1: Analysis of the impact of adding fixed word embeddings (GloVe [1], dependency embeddings [2] or both) to the Up-Down [3] captioning model.  $Txofy$  indicates the model was decoded using constrained beam search [4] requiring the inclusion of at least  $x$  of the top  $y$  concepts randomly selected from the ground-truth image labels. Adding fixed embeddings has a slightly negative impact on the model when decoding without constraints (top panel). However, concatenating both embeddings (capturing both semantic and functional information) helps to preserve fluency during constrained decoding (bottom two panels).

| Model                 | Out-of-Domain Val Scores |             |             |             | In-Domain Val Scores |             |              |
|-----------------------|--------------------------|-------------|-------------|-------------|----------------------|-------------|--------------|
|                       | SPICE                    | METEOR      | CIDEr       | F1          | SPICE                | METEOR      | CIDEr        |
| Up-Down               | 14.4                     | 22.1        | 69.5        | 0.0         | 19.9                 | 26.5        | 108.6        |
| Up-Down-GloVe         | 14.0                     | 21.6        | 66.4        | 0.0         | 19.5                 | 26.2        | 104.1        |
| Up-Down-Dep           | 14.3                     | 21.9        | 67.9        | 0.0         | 19.4                 | 26.0        | 105.0        |
| Up-Down-Both          | 14.0                     | 21.8        | 66.7        | 0.0         | 19.5                 | 26.1        | 104.0        |
| Up-Down-GloVe + T2of3 | 18.0                     | 24.4        | 80.2        | 28.3        | 22.2                 | <b>27.9</b> | 109.0        |
| Up-Down-Dep + T2of3   | 17.8                     | 24.4        | 79.5        | 23.8        | 21.8                 | 27.5        | 107.3        |
| Up-Down-Both + T2of3  | <b>18.3</b>              | <b>24.9</b> | <b>84.1</b> | <b>31.3</b> | <b>22.3</b>          | 27.8        | <b>109.4</b> |
| Up-Down-GloVe + T3of3 | 19.0                     | 24.6        | 80.1        | 45.2        | <b>23.0</b>          | 27.4        | 101.4        |
| Up-Down-Dep + T3of3   | 19.0                     | 24.5        | 79.0        | 42.2        | 22.3                 | 26.9        | 98.4         |
| Up-Down-Both + T3of3  | <b>19.6</b>              | <b>25.1</b> | <b>82.2</b> | <b>45.8</b> | <b>23.0</b>          | <b>27.5</b> | <b>102.2</b> |

---

\*Now at Georgia Tech (peter.anderson@gatech.edu)

|                                                                                     |                                                                                     |                                                                                      |                                                                                       |
|-------------------------------------------------------------------------------------|-------------------------------------------------------------------------------------|--------------------------------------------------------------------------------------|---------------------------------------------------------------------------------------|
| zebra                                                                               | bus                                                                                 | couch                                                                                | microwave                                                                             |
|    |    |    |    |
| <b>Baseline:</b> A group of giraffes standing next to each other.                   | <b>Baseline:</b> A group of people standing in front of a building.                 | <b>Baseline:</b> A living room filled with furniture and a chair.                    | <b>Baseline:</b> A kitchen with wood cabinets and wooden appliances.                  |
| <b>Ours:</b> A group of <u>zebra</u> standing next to each other.                   | <b>Ours:</b> A group of people standing next to a <u>bus</u> .                      | <b>Ours:</b> A white <u>couch</u> sitting in a living room.                          | <b>Ours:</b> A kitchen with a stainless steel refrigerator.                           |
|    |    |    |    |
| <b>Baseline:</b> A black and white photo of a giraffe eating grass.                 | <b>Baseline:</b> A yellow truck with graffiti on the road.                          | <b>Baseline:</b> A brown and white dog laying on a bed.                              | <b>Baseline:</b> A picture of a kitchen with an oven.                                 |
| <b>Ours:</b> A zebra standing in a field eating grass.                              | <b>Ours:</b> A yellow bus driving down a city street.                               | <b>Ours:</b> A brown and white dog sitting on a <u>couch</u> .                       | <b>Ours:</b> A <u>microwave</u> oven sitting on display.                              |
| pizza                                                                               | racket                                                                              | suitcase                                                                             | bottle                                                                                |
|  |  |  |  |
| <b>Baseline:</b> A man and a woman eating food at a table.                          | <b>Baseline:</b> A man standing in front of a white fence.                          | <b>Baseline:</b> A man and a woman standing next to a car.                           | <b>Baseline:</b> A person sitting on top of a laptop computer.                        |
| <b>Ours:</b> A woman sitting at a table eating <u>pizza</u> .                       | <b>Ours:</b> A man holding a tennis <u>racket</u> on a court.                       | <b>Ours:</b> A woman standing next to a man holding a <u>suitcase</u> .              | <b>Ours:</b> A person sitting next to a computer keyboard.                            |
|  |  |  |  |
| <b>Baseline:</b> A piece of food is on a plate.                                     | <b>Baseline:</b> A young girl playing a game of tennis.                             | <b>Baseline:</b> A cat laying on top of a bag.                                       | <b>Baseline:</b> Two glasses of wine are sitting on a table.                          |
| <b>Ours:</b> A piece of pizza sitting on top of a white plate.                      | <b>Ours:</b> A girl hitting a tennis ball on a court.                               | <b>Ours:</b> A cat sitting on top of a <u>suitcase</u> .                             | <b>Ours:</b> A glass of wine sitting on top of a table.                               |

Figure 1: Further examples of captions generated by the Up-Down captioning model (top) and the same model trained with additional image labels using PS3 (bottom). All images shown contain held-out objects.

|                                                                                     |                                                                                     |                                                                                      |                                                                                       |
|-------------------------------------------------------------------------------------|-------------------------------------------------------------------------------------|--------------------------------------------------------------------------------------|---------------------------------------------------------------------------------------|
| koala                                                                               | goat                                                                                | deer                                                                                 | monkey                                                                                |
|    |    |    |    |
| <b>Baseline:</b> A tree that is standing next to a branch.                          | <b>Baseline:</b> A brown and white dog laying in a pen.                             | <b>Baseline:</b> A herd of animals that are standing in the grass.                   | <b>Baseline:</b> Two brown bears are playing in the water.                            |
| <b>Ours:</b> A monkey that is sitting in a tree.                                    | <b>Ours:</b> A <u>goat</u> that is sitting in the grass.                            | <b>Ours:</b> A <u>deer</u> that is sitting in the grass.                             | <b>Ours:</b> A monkey that is sitting in the water.                                   |
| squirrel                                                                            | lion                                                                                | rabbit                                                                               | lion                                                                                  |
|  |  |  |  |
| <b>Baseline:</b> A cat sitting on top of a tree branch.                             | <b>Baseline:</b> A statue of a bear in front of a building.                         | <b>Baseline:</b> A close up of a black and white cat.                                | <b>Baseline:</b> A statue of an elephant sitting on a sidewalk.                       |
| <b>Ours:</b> A <u>squirrel</u> that is sitting on a tree.                           | <b>Ours:</b> A statue of a <u>lion</u> that is sitting on a tree.                   | <b>Ours:</b> A close up of a black cat sitting on the floor.                         | <b>Ours:</b> A statue of a <u>lion</u> sitting on a cobblestone sidewalk.             |

Figure 2: Further examples of captions generated by the Up-Down captioning model trained on COCO (top) and the same model trained with COCO and image labels from an additional 25 Open Images animal classes using PS3 (bottom). Several examples are failure cases (but no worse than the baseline).

## References

- [1] Jeffrey Pennington, Richard Socher, and Christopher D. Manning. GloVe: Global Vectors for Word Representation. In *EMNLP*, 2014.
- [2] Omer Levy and Yoav Goldberg. Dependency-based word embeddings. In *ACL*, 2014.
- [3] Peter Anderson, Xiaodong He, Chris Buehler, Damien Teney, Mark Johnson, Stephen Gould, and Lei Zhang. Bottom-up and top-down attention for image captioning and visual question answering. In *CVPR*, 2018.
- [4] Peter Anderson, Basura Fernando, Mark Johnson, and Stephen Gould. Guided open vocabulary image captioning with constrained beam search. In *EMNLP*, 2017.
